# Supplementary material
Source: PubMed Central journal article supplement (PMC3416001)
Supplement: supp_112.141739_FigureS1.pdf [file supp_112.141739_FigureS1.pdf]

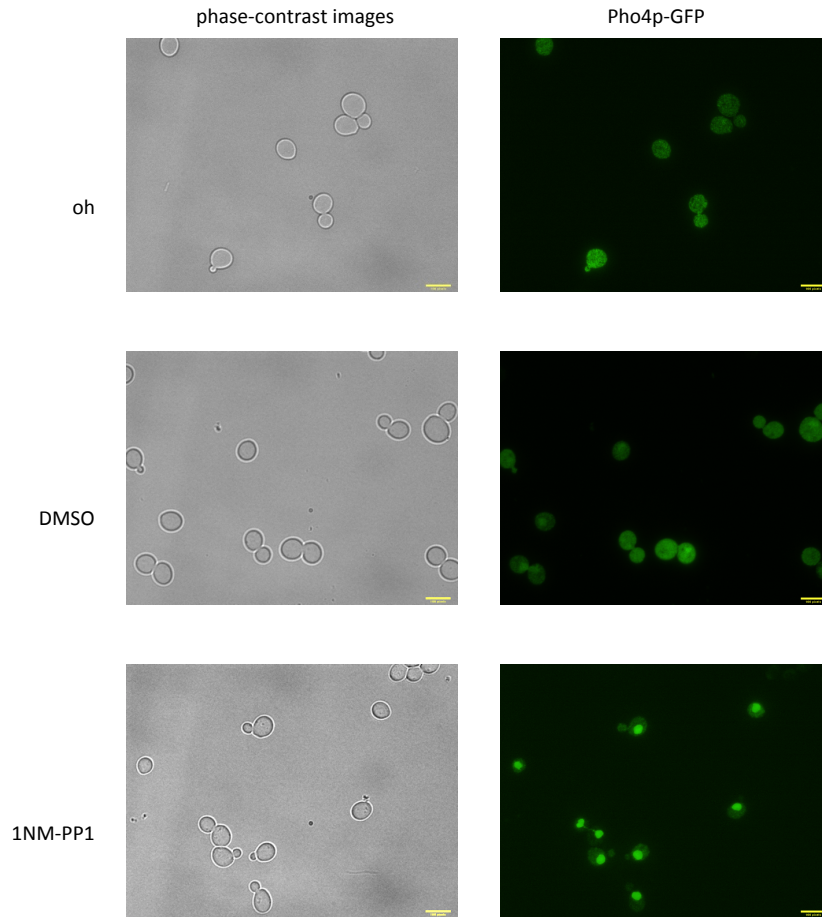

**Figure S1** The direct Pho85 target, Pho4, is desphosphorylated upon Pho85 inhibition with 1NM-PP1 and shuttled from the cytoplasm to the nucleus. *pho85-as/cdc28as* strain was transformed with an expression plasmid containing a Pho4p-GFP fusion construct under the control of the ADH1 promoter (BA1828, B. Andrews lab). Cells were grown to an OD<sub>600</sub> of 0.5 (0h) and treated with DMSO or 25 μM 1NM-PP1. Cellular localization of Pho4p was analyzed using fluorescence microscopy at 15 min after treatment. Representative fields are shown.
