# Supplementary material
Source: PubMed Central journal article supplement (PMC3416001)
Supplement: supp_112.141739_FigureS2.pdf [file supp_112.141739_FigureS2.pdf]

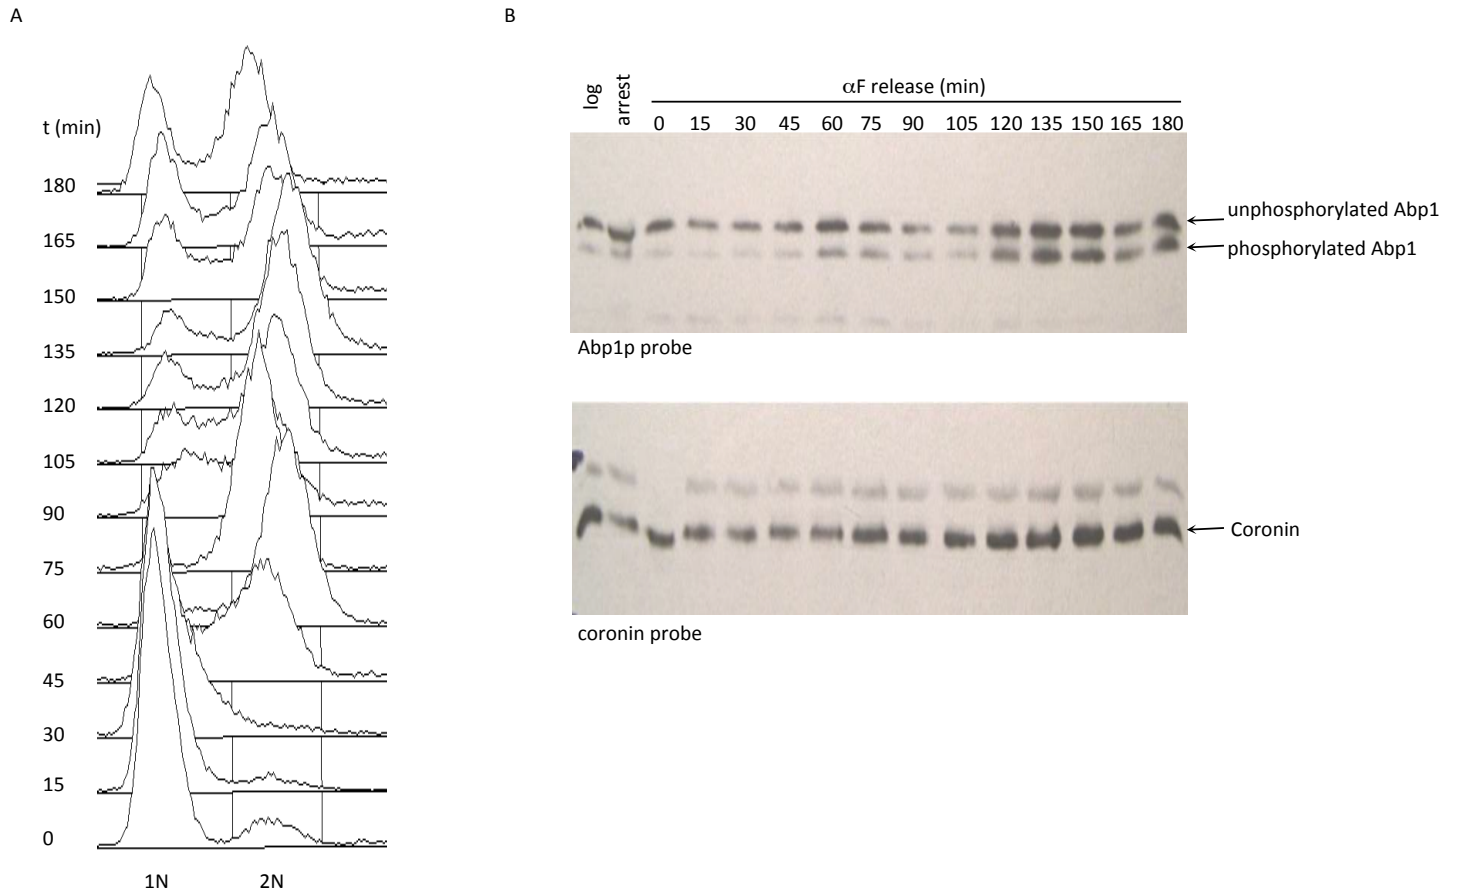

**Figure S2** Abp1p expression is not cell cycle regulated. **(A)** Flow cytometry analysis of DNA content of wild type yeast cells synchronized by release from  $\alpha$ -factor at the indicated times in the left. **(B)** Protein extracts were analyzed by Western blotting using polyclonal anti-Abp1p antibody to monitor Abp1p levels or anti-coronin antibody to control for cellular protein levels. Time is minutes after  $\alpha$ -factor release. The positions of phosphorylated and unphosphorylated Abp1p are indicated.
