# Supplementary material
Source: PubMed Central journal article supplement (PMC3416001)
Supplement: supp_112.141739_FigureS3.pdf [file supp_112.141739_FigureS3.pdf]

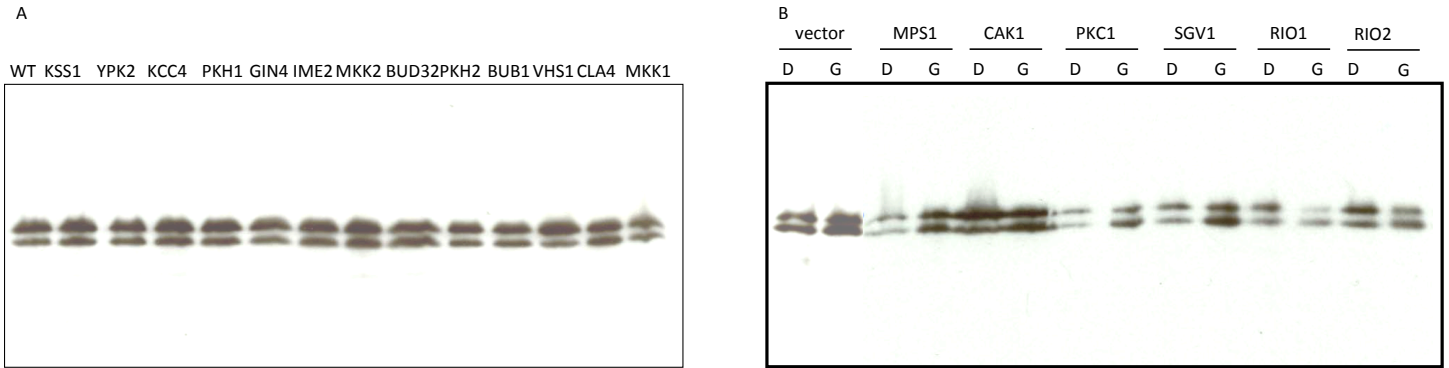

**Figure S3** Representative Western blots of Abp1p expression in strains bearing single deletions of non-essential kinases (A) or over-expression of essential kinases (B). (A) Western blot analysis, using polyclonal anti-Abp1p antibody, of yeast extracts from kinase deleted strains backgrounds. (B) Western blot analysis, using polyclonal anti-Abp1p antibody, of yeast extracts from transformants expressing various essential kinases from the *GAL1* promoter. Extracts were made from mid-log phase cells grown in presence of glucose (D) or galactose (G).
